# Supplementary material for: The mitogen-activated protein kinase phosphatase-1 (MKP-1) gene is a potential methylation biomarker for malignancy of breast cancer
Source: PubMed Central journal article supplement — Exp Mol Med. 2012 Feb 15;44(5):356–62. doi: 10.3858/emm.2012.44.5.040 (PMC3366329; doi:10.3858/emm.2012.44.5.040), 2012-02-15
Supplement: emm-44-356-s001.pdf [file emm-44-356-s001.pdf]

**Supplementary Table S1.** PCR primer sequences in this study

| Genes             |   | Sequences (5'→3')         | T <sub>m</sub> (°C) | Size (bp) | PCR cycles |
|-------------------|---|---------------------------|---------------------|-----------|------------|
| <i>Actin</i> mRNA | F | GGCCAACCGCGAGAAGAT        | 55                  | 133       | 35         |
|                   | R | CGTCACCGGAGTCCATCAC       |                     |           |            |
| <i>MKP1</i> mRNA  | F | AAAATGGGGCAGAAGAGAAAGG    | 56                  | 296       | 35         |
|                   | R | ACCCAACACTGGTATTTTCC      |                     |           |            |
| <i>MKP-1</i> (M)* | F | ACGCGTTAAGAGTAGGTCGG      | 54                  | 155       | 35         |
|                   | R | ATCACGTAACGAAACGATAACGT   |                     |           |            |
| <i>MKP-1</i> (U)* | F | GGATGTGTTAAGAGTAGGTTGG    | 54                  | 158       | 35         |
|                   | R | AATCACATAACAAAACAATAACATC |                     |           |            |

\*Primers correspond to methylated (M) or unmethylated (U) CpG islands within gene promoter regions.
